# Supplementary material for: Impact of germline genetic variation on breast cancer prognosis: a systematic review and meta-analysis
Source: BMC Cancer. 2026 Mar 4;26:531. doi: 10.1186/s12885-026-15808-7 (PMC13122941; doi:10.1186/s12885-026-15808-7)
Supplement: Supplementary file 1 — Supplementary Material 1. Additional file 1: Table S1. Search strings with the term “germline variants”; Table S2. Search strings with the term “germline polymorphisms”; Table S3. Complete search strings with Boolean operators for every database; and Figure S1. Graph representing the main methodology characteristics and results of the 54 articles included. [file 12885_2026_15808_MOESM1_ESM.xlsx]

## Sheet: Sheet1
#	First Author	Year	Journal	Title	Study design	Cohort name	Geographic location (COUNTRY)	Population	Sample size	Follow-up (mean years)	Mean age	Sex	Race / ethinicity (include %)	Menopausal status (% post)	Breast cancer stage at diagnosis	Molecular subtype of breast cancer (categories if stratified analysis)	Outcome assessment Disease free survival	Outcome assessment Local recurrence	Outcome assessment Distant recurrence	Outcome assessment Death	Exposure assessment (genetic variants)	Gene	ID	Allele / Genotype	Measure of association	P value	Univariate or age-adjusted Effect estimate:	LCL (Lower Control Limit)	UCL (Upper Control Limit)	P value Multivariable Effect estimate	Multivariable Effect estimate:	LCL2	UCL2	Confounders (list)	Were these variables measured with precision and at appropriate points in time?	Was selection into the study unrelated to both the exposure and outcomes?	% lost to follow-up	Selection bias correction	Validation of self-reported variables	Were the methods of outcome assessment comparable across exposure groups?	Assessment of the risk of bias (low/moderate/high)	NOTES
1	Zhu, Qianqian	2022	npj Breast Cancer	UACA locus is associated with breast cancer chemoresistance and survival	Cohort	Pathways Study	USA	Trans-ethnic	3973	5	55.7	Women	European 70.50%, East Asian 11.32%, Hispanic 9.87% and African 8.31%	NO DATA	All stages	Stratified by PR, ER and HER2 status	NA	self-report, the KPNC Cancer, all confirmed through medical record review Registry, or through an algorithm designed to identify possible recurrences through clinical events, such as ICD9 or 10 code	NA	Registry	GWAS by Illumina Multi-Ethnic Global Array	ARRDC3	rs421379	T	Hazard ratio	NA	NO DATA	NO DATA	NO DATA	0.0145	5.93	NO DATA	NO DATA	Age at diagnosis, body mass index, tumor grade, stage of disease, ER, progesterone receptor, and HER2 status, hormonal therapy, chemotherapy, radiation therapy, surgery type, and all population stratification principal components	Yes	Yes	NO DATA	NO DATA	Yes (Race and Ethnicity)	Yes	Low	YOUNG WOMEN 109 PATIENTS 9 EVENTS
																						UACA	rs11855431	C	Hazard ratio	NA	NO DATA	NO DATA	NO DATA	0.0061	NO DATA	NO DATA	NO DATA
																						UACA	rs720251	T	Hazard ratio	NA	NO DATA	NO DATA	NO DATA	4.19e-09	2.79	NO DATA	NO DATA
																						UACA	rs62019060	G	Hazard ratio	NA	NO DATA	NO DATA	NO DATA	1.27e-09	3.01	NO DATA	NO DATA
						DBBR	Europe	European	451	7	51	Women	European	NO DATA	All stages	Stratified by PR, ER and HER2 status	NA	NA	NA	Registry	TaqMan® SNP Genotyping Assay	UACA	rs11855431	C	Hazard ratio	NA	NO DATA	NO DATA	NO DATA	0.56	1.19	NO DATA	NO DATA
																							rs6494889	A	Hazard ratio	NA	NO DATA	NO DATA	NO DATA	0.67	1.13	NO DATA	NO DATA
																							rs28607477	C	Hazard ratio	NA	NO DATA	NO DATA	NO DATA	0.66	1.14	NO DATA	NO DATA
																							rs720251	T	Hazard ratio	NA	NO DATA	NO DATA	NO DATA	0.72	1.11	NO DATA	NO DATA
2	Escala-Garcia, Maria	2021	Nature Scientific Reports	Germline variants and breast cancer survival in patients with distant metastases at primary breast cancer diagnosis	Retrospective	Breast Cancer Association Consortium (BCAC)	Europe	European	1062	15	60	Women	European	NO DATA	IV	All and stratified by ER postive and ER negative	NA	NA	NA	Registry	Genotyping platforms: iCOGS and OncoArray	Near SDE2 and H3F3A	rs138569520 rs146023652 rs114512448 rs143653255 rs115086585 rs72757046 Genotyping platforms: iCOGS and OncoArray	C	Hazard ratio	3.19e-08	3.67	1.86	7.23	NA	NO DATA	NO DATA	NO DATA	ER status, Country	Yes	No, only metastatic patients	NO DATA	NO DATA	NO DATA	Yes	Low	METASTATIC PRIMARY BREAST CANCER AT DIAGNOSIS, unaable to validate the association with a smaller et of patients.
																							rs146023652	T	Hazard ratio	4.42e-08	3.64	1.84	7.19	NA	NO DATA	NO DATA	NO DATA
																							rs114512448	A	Hazard ratio	6.57e-08	3.53	1.78	6.95	NA	NO DATA	NO DATA	NO DATA
																							rs143653255	C	Hazard ratio	1.57e-06	3.26	1.68	6.34	NA	NO DATA	NO DATA	NO DATA
																							rs115086585	T	Hazard ratio	2.93e-07	3.21	1.64	6.25	NA	NO DATA	NO DATA	NO DATA
																							rs72757046	C	Hazard ratio	6.02e-07	3.62	1.78	7.37	NA	NO DATA	NO DATA	NO DATA
3	Viktor Hlaváč	2021	International Journal of Molecular Sciences	Role of Genetic Variation in Cytochromes P450 in Breast Cancer Prognosis and Therapy Response	Cohort	No name	Czech Republic, Europe	European	805	10	51.7	Women, but not specified	European	0.5238	I-III	All subtypes	Registry	NA	NA	NA		CYP4X1	rs17102977	G	Hazard ratio	NA	NO DATA	NO DATA	NO DATA	0.048	1.69	1.01	2.85	Tumor size and grade, lymph node metastasis, and estrogen receptor expression.	Yes	Yes	NO DATA	NO DATA	NO DATA		Low
																						CYP26B1	rs62150087	G	Hazard ratio	NA	NO DATA	NO DATA	NO DATA	0.016	0.54	0.33	0.89									Not in unselected patients for treatment
																						CYP24A1	rs2762934	A	Hazard ratio	NA	NO DATA	NO DATA	NO DATA	0.075	NA	NA	NA									Subgroup of cytotoxic therapy-treated group
4	Wan, Q.	2021	JAMA Network Open	Comparison of Survival after Breast-Conserving Therapy vs Mastectomy among Patients with or without the BRCA1/2 Variant in a Large Series of Unselected Chinese Patients with Breast Cancer	Retrospective Cohort	No name	China	Chinese	8396	12	50.8	Women	Asian	NO DATA	I-III	All subtypes	Registry	Registry	Registry	Registry		BRCA1	NO DATA	NA	Hazard ratio	NA	NO DATA	NO DATA	NO DATA	0.3	0.55	0.21	1.44	Age at first breast cancer diagnosis ( 45 vs >45 years), family history of breast and ovarian cancer (with vs without), year of diagnosis (2003-2009 vs 2010-2015), estrogen receptor status, progesterone receptor status, ERBB2 status, lymph node status, (positive vs negative), tumor size (>3 vs 3 cm), grade (III vs I and II; unknown vs I and II), and adjuvant therapy (chemotherapy vs endocrine the…	Yes	Yes	NO DATA	NO DATA	NO DATA		High
																						BRCA2	NO DATA	NA	Hazard ratio	NA	NO DATA	NO DATA	NO DATA	0.009	0.71	0.34	1.49
5	Matteo Lambertini	2021	npj Breast Cancer	Clinical behavior and outcomes of breast cancer in young women with germline BRCA pathogenic variants	Retrospective Cohort	No name	Italy	Europe, North America, Latin America, Israel	1236	7.9	34	Women	No ethnicity, only countries	NO DATA	I-III	All subtypes	Registry	NA	Registry	Registry		BRCA1	NO DATA	NA	Hazard ratio	NA	NO DATA	NO DATA	NO DATA	NO DATA	0.76	0.6	0.96	NO DATA	Yes	Yes	NO DATA	NO DATA	NO DATA		High	No difference in distant recurrence-free interval (DRFI) and overall survival (OS)
6	Valentina Aristarco	2021	Nutrients	Association of Vitamin D Receptor and Vitamin D-Binding Protein Polymorphisms with Familial Breast Cancer Prognosis in a Mono-Institutional Cohort	Cohort	No name	Italy	European	368	9	42	Women	European	NO DATA	I-III	All subtypes	Registry	NA	NA	NA		VDR	rs731236 (Taq 1)	A	Hazard ratio	0.02	0.62	0.42	0.91	NA	NO DATA	NO DATA	NO DATA	NO DATA	Yes	Yes	NO DATA	NO DATA	NO DATA	Yes	Moderate	Not for overall survival only DFS
																						VDR	rs1544410 (Bsm 1)	T	Hazard ratio	0.03	0.64	0.43	0.96	NA	NO DATA	NO DATA	NO DATA									Better prognosis
7	Anna Morra	2021	Breast Cancer Research	Association of germline genetic variants with breast cancer-specific survival in patient subgroups defined by clinic-pathological variables related to tumor biology and type of systemic treatment	Retrospective	Breast Cancer Association Consortium	Netherlands	European	91686	8.1	NO DATA	Women	European	NO DATA	All stages	All subtypes	NA	NA	NA	Registry	GWAS by iCOGS and OncoArray	TBL1X	rs5934618	G	Hazard ratio	NA	NO DATA	NO DATA	NO DATA	3e-07	1.36	1.21	1.56	Age at diagnosis, estrogen receptor (ER) status, progesterone receptor (PR) status, human epidermal growth factor receptor 2 (HER2) status, tumor grade, and the use and type of systemic treatment	Yes	Yes	NO DATA	NO DATA	NO DATA	Yes	Moderate	Subgroup of Grade 3 tumors
																						LINC01487,STRIT1	rs4679741	G	Hazard ratio	NA	NO DATA	NO DATA	NO DATA	1.1e-08	1.2	1.13	1.28									Subgroup of patients diagnosed with an ER+ tumor and treated with endocrine therapy
																						GRIP2	rs1106333	A	Hazard ratio	NA	NO DATA	NO DATA	NO DATA	4.1e-08	1.67	1.39	2									Subgroup of patients diagnosed with an ER− tumor and treated with chemotherapy
																						ARAP2	rs78754389	A	Hazard ratio	NA	NO DATA	NO DATA	NO DATA	4.4e-08	1.7	1.41	2.05									Subgroup of patients diagnosed with an ER− tumor and treated with chemotherapy
8	Abdul Khalid Siraj	2021	Hereditary Cancer in Clinical Practice	Prevalence of germline TP53 mutation among early onset middle eastern breast cancer patients	Cohort	No name	Saudi Arabia	Arab	464	3.41	36	Women	Arab	NO DATA	All stages	All subtypes	Registry	Registry	Registry	Registry	Capture sequencing technology	TP53	Group of 9 mutations (No ID)	NA	Log-rank test	0.0003	NA	NA	NA	NA	NA	NA	NA	NO DATA	No	Yes	NO DATA	NO DATA	NO DATA	Yes	High
9	Viktor Hlaváč	2020	International Journal of Molecular Sciences	Role of Genetic Variation in ABC Transporters in Breast Cancer Prognosis and Therapy Response	Cohort	No name	Czech Republic	European	802	6.33	58.9	Women	European	75	All stages	All subtypes	Registry	NA	NA	NA	PCR Genotyping	ABCA13	rs17548783	C	Log-rank test	0.039	NA	NA	NA	NA	NA	NA	NA	NO DATA	Yes	Yes	NO DATA	NO DATA	NO DATA	Yes	Moderate	TNBC
																						ABCA13	rs74859514	C	Log-rank test	NO DATA	NA	NA	NA	NA	NA	NA	NA
																						ABCA7	rs9282562	2685-13delTG	Log-rank test	0.01	NA	NA	NA	NA	NA	NA	NA									HER SUBTYPE
																						ABCC4	rs899494	A	Log-rank test	0.001	NA	NA	NA	NA	NA	NA	NA									HER SUBTYPE
																						ABCC5	rs899495	G	Log-rank test	0.009	NA	NA	NA	NA	NA	NA	NA									TNBC
																						ABCG8	rs34198326	GG	Log-rank test	0.04	NA	NA	NA	NA	NA	NA	NA									LUMINAL B
10	Maria Escala-Garcia	2020	Nature Communications	A network analysis to identify mediators of germline-driven differences in breast cancer prognosis	Retrospective	Breast Cancer Association Consortium (BCAC) dataset		European	84457	NO DATA	NO DATA	Women	European	NO DATA	NO DATA	All subtypes	NA	NA	NA	Registry	GWAS	ADRBK2, CCL16, CNR2, CXCR5, DNAJB4, F2R, GNA15, GNAT1, GRM4, GUCA1A, GUCA1B, GUCA2B, GUCY2D, HRH4, LTB4R, OPRK1, OPRM1, RGS9, and RGS9BP	GRPM a1	NA	Hazard ratio	NA	NO DATA	NO DATA	NO DATA	NO DATA	1.13	1.07	1.21	NO DATA	Yes	Yes	NO DATA	Yes	NO DATA	Yes	Low	ER-
																						ADCY10, GNA11, PTGIR, and RGS3	GRPM a2	NA	Hazard ratio	NA	NO DATA	NO DATA	NO DATA	NO DATA	1.15	1.08	1.22									ER-
																						PER1, PER3, TIMELESS, and TIPIN	GRPM b	NA	Hazard ratio	NA	NO DATA	NO DATA	NO DATA	NO DATA	1.28	1.19	1.37									ER-
																						CHCHD4, PDE9A, SLC36A1, and PHYHIPL	GRPM c	NA	Hazard ratio	NA	NO DATA	NO DATA	NO DATA	NO DATA	1.2	1.12	1.28									ER-
																						ARHGAP10, CCNT2, CDR2, HEXIM1, NEUROD2, PKN1, and ZFAND6	GRPM d	NA	Hazard ratio	NA	NO DATA	NO DATA	NO DATA	NO DATA	1.21	1.16	1.28									ER+
11	Jolanta Pamuła-Piłat	2020	Nature Scientific Reports	Genetic 3'UTR variations and clinical factors significantly contribute to survival prediction and clinical response in breast cancer patients	Cohort	No name	Southern Poland	Caucasians	305	5	54.7	Women	Caucasians	NO DATA	All stages	All subtypes	Registry	NA	NA	Registry	PCR	NR1/2	rs3732359	AA	Hazard ratio	NA	NO DATA	NO DATA	NO DATA	0.003	1.82	1.24	2.8	NO DATA	Yes	Yes	NO DATA	NO DATA	NO DATA	Yes	Low	Shortened OS
																						SLC22A16	rs7756222	CC	Hazard ratio	NA	NO DATA	NO DATA	NO DATA	0.027	1.58	1.05	2.36									Shortened OS
																						SLC22A16	rs7756222	CC	Hazard ratio	NA	NO DATA	NO DATA	NO DATA	0.021	1.57	1.07	2.32
																						SLC22A16	rs9487402	G	Hazard ratio	NA	NO DATA	NO DATA	NO DATA	0.009	1.72	1.14	2.59									Shortened OS
																						PGR	rs1824125	GG	Hazard ratio	NA	NO DATA	NO DATA	NO DATA	0.029	1.76	1.06	2.95									PFS
																						PGR	rs12224560	CC	Hazard ratio	NA	NO DATA	NO DATA	NO DATA	0.029	1.76	1.06	2.92									PFS
																						DPYD	rs291593	CC	Hazard ratio	NA	NO DATA	NO DATA	NO DATA	0.022	5.89	1.29	26.88									Increased risk of RFS
																						AKR1C3	rs3209896	AG	Hazard ratio	NA	NO DATA	NO DATA	NO DATA	0.028	5.49	1.2	25.05									Increased risk of RFS
12	Qingyang Xiao	2020	International Journal of Cancer	Germline variant burden in multidrug resistance transporters is a therapy-specific predictor of survival in breast cancer patients	Cohort	BRCA	Sweden	Trans-ethnic	960	NO DATA	58	950 female, 10 male	772 Non-Hispanic, 34 Hispanic, 154 N/A	631 Post, 206 Pre, 89 N/A	All stages	All subtypes	NA	NA	NA	Registry	WES	ABCC1	rs45607431	C	Log-rank test	2.4e-14	NA	NA	NA	NA	NO DATA	NO DATA	NO DATA	NO DATA	No	Yes	NO DATA	NO DATA	NO DATA	Yes	Moderate
																						ABCG2	rs200190472	A	Log-rank test	3.5e-13	NA	NA	NA	NA	NO DATA	NO DATA	NO DATA
																						ABCC1	rs8187849	T	Log-rank test	0.005	NA	NA	NA	NA	NO DATA	NO DATA	NO DATA
																						ABCC1	rs35588	G	Log-rank test	0.02	NA	NA	NA	NA	NO DATA	NO DATA	NO DATA
																						ABCC1	rs35587	C	Log-rank test	0.02	NA	NA	NA	NA	NO DATA	NO DATA	NO DATA
																						ABCC1	rs246221	C	Log-rank test	0.02	NA	NA	NA	NA	NO DATA	NO DATA	NO DATA
																						ABCC1	rs903880	A	Log-rank test	0.03	NA	NA	NA	NA	NO DATA	NO DATA	NO DATA
																						ABCC1	rs35595	A	Log-rank test	0.03	NA	NA	NA	NA	NO DATA	NO DATA	NO DATA
																						ABCC1	rs4148372	TGGGGCTGGGGCTGGGGCTGGGGCTGGG	Log-rank test	0.04	NA	NA	NA	NA	NO DATA	NO DATA	NO DATA
																						ABCG2	rs2231162	A	Log-rank test	0.02	NA	NA	NA	NA	NO DATA	NO DATA	NO DATA
13	Taru A Muranen	2020	npj Breast Cancer	Association of germline variation with the survival of women with BRCA1/2 pathogenic variants and breast cancer	Cohort	CIMBA	Finland	European	3008	15	41.8	Women	European	NO DATA	All stages	ER-	NA	NA	NA	Registry	OncoArray	DCAF1	rs57025206	CTTTCTGCAG	Hazard ratio	3.1e-09	4.37	3.03	6.3	NO DATA	6.19	3.73	10.3	Tumor grade, size, PgR expression status, and lymph node involvement	Yes	Yes	NO DATA	NO DATA	NO DATA	Yes	Low	BRCA1 carries with ER negative breast cancer
									2009		45					ER-						DCAF1	rs57025206	CTTTCTGCAG	Hazard ratio	3.1e-09	0.94	0.59	1.51	NA	NO DATA	NO DATA	NO DATA									No association in BRCA2 carries with ER negative breast cancer
																All subtypes							rs12126206	A	Hazard ratio	1.7e-07	1.86	1.5	2.32	NA	NO DATA	NO DATA	NO DATA									BRCA1 All subtypes
																All subtypes							rs5028286	GG	Hazard ratio	3.3e-07	1.74	1.42	2.12	NA	NO DATA	NO DATA	NO DATA									BRCA1 All subtypes
																All subtypes							rs736418	GG	Hazard ratio	2.4e-07	0.6	0.49	0.73	NA	NO DATA	NO DATA	NO DATA									BRCA1 All subtypes
																All subtypes							rs147857072	C	Hazard ratio	4e-07	3.41	2.32	5	NA	NO DATA	NO DATA	NO DATA									BRCA1 All subtypes
																All subtypes							rs59010985	T	Hazard ratio	1.3e-07	0.58	0.47	0.72	NA	NO DATA	NO DATA	NO DATA									BRCA1 All subtypes
																All subtypes							rs537497819	GT	Hazard ratio	4.3e-07	1.49	1.27	1.74	NA	NO DATA	NO DATA	NO DATA									BRCA1 All subtypes
																ER-							rs1829314	T	Hazard ratio	1.2e-07	0	0	0	NA	NO DATA	NO DATA	NO DATA									BRCA1 carries with ER negative breast cancer
																ER-							rs149851278	G	Hazard ratio	3.1e-07	0.43	0.29	0.63	NA	NO DATA	NO DATA	NO DATA									BRCA1 carries with ER negative breast cancer
																ER-							rs11245414	T	Hazard ratio	2.7e-07	0.56	0.46	0.7	NA	NO DATA	NO DATA	NO DATA									BRCA1 carries with ER negative breast cancer
																ER-							rs78150318	T	Hazard ratio	1.3e-07	0	0	0	NA	NO DATA	NO DATA	NO DATA									BRCA1 carries with ER negative breast cancer
14	Singla H.	2019	Molecular Biology Reports	Genomic alterations associated with HER2+ breast cancer risk and clinical outcome in response to trastuzumab	Cohort	No name	India	Malwa region in Punjab	100	2.25	53.23	Women	Indian	46% postmenopausal	NO DATA	HER2+	Registry	NA	Registry	Registry	PCR-RFLP	CCND1	P241P rs9344	G	Log-rank test	0.018	NA	NA	NA	NA	NO DATA	NO DATA	NO DATA	NO DATA	Yes	Yes	NO DATA	NO DATA	NO DATA	Yes	Moderate
																						PIK3CA	E542K rs121913273	A	Log-rank test	0.005	NA	NA	NA	NA	NO DATA	NO DATA	NO DATA
15	Damien Coté	2018	PLOS ONE	Germline single nucleotide polymorphisms in ERBB3 and BARD1 genes result in a worse relapse free survival response for HER2-positive breast cancer patients treated with adjuvant based docetaxel, carboplatin and trastuzumab (TCH)	Retrospective	No name	Ireland	UK population	157	10	51	Women	NO DATA	NO DATA	All stages	HER2+	Registry	NA	NA	NA	Sequencing	ERBB3	rs2229046	C	Hazard ratio	NA	NO DATA	NO DATA	NO DATA	0.00151	2.79	1.91	4.95	Age, estrogen receptor (ER) and progesterone receptor (PR) status.	Yes	Yes	NO DATA	NO DATA	NO DATA	Yes	Low	TCH Treated Patients
																						ERBB3	rs773123	A	Hazard ratio	NA	NO DATA	NO DATA	NO DATA	0.05	2.67	1.02	7.03									TCH Treated Patients
																						BARD1	rs2070096	T	Hazard ratio	NA	NO DATA	NO DATA	NO DATA	0.05	3.27	1.16	9.17									TCH Treated Patients
																						BARD1	rs2229571	C	Hazard ratio	NA	NO DATA	NO DATA	NO DATA	0.25	NA	NA	NA
																						ERBB2	rs1136201	G	Hazard ratio	NA	NO DATA	NO DATA	NO DATA	0.05	2.67	1.05	6.78									TCH Treated Patients
																						RNF8	rs2284922	T	Hazard ratio	NA	NO DATA	NO DATA	NO DATA	0.9	NA	NA	NA									Patients Not Treated With TCH
16	Yong Alison Wang	2018	BMC Cancer	Germline breast cancer susceptibility gene mutations and breast cancer outcomes	Cohort	No name	Taiwan	Chinese	480	5	41.8	Both	Chinese	NO DATA	All stages	All subtypes	Registry	Registry	Registry	Registry	Next generation sequencing platform	BRCA	NO DATA	NA	Hazard ratio	0.013	2.42	1.29	4.53	0.05	3.04	1.4	6.58	Tumor size > 2 cm, lymph node positivity, triple negative tumor type, young age of onset (≤ 40), mastectomy (vs breast-conserving surgery), adjuvant chemotherapy, adjuvant radiotherapy, and hormonal therapy.	Yes	Yes	NO DATA	NO DATA	Yes	Yes	Low	Recurrence or death
																						BRCA	NO DATA	NA	Hazard ratio	0.016	2.22	1.2	4.47	0.016	2.7	1.2	6.06									Any recurrence
																						BRCA	NO DATA	NA	Hazard ratio	0.011	2.58	1.24	5.94	0.029	2.86	1.11	7.35									Distant recurrence
																						BRCA	NO DATA	NA	Hazard ratio	0.35	1.84	0.52	6.54	0.018	8.01	1.44	44.7									Any death
17	Tomas Pascual	2017	PLOS ONE	Polymorphisms associated with everolimus pharmacokinetics, toxicity and survival in metastatic breast cancer	Cohort	No name	Spain	NO DATA	90	NO DATA	62	Women	NO DATA	1	III-IV	HR+, HER2-	NA	NA	NA	Registry	Genotyping	RAPTOR	rs9906827	T	Hazard ratio	0.026	0.65	0.45	0.94	0.007	0.49	0.29	0.82	NO DATA	Yes	Yes	NO DATA	NO DATA	NO DATA	Yes	Moderate
18	Chike O Abana	2017	PLOS ONE	IL-6 variant is associated with metastasis in breast cancer patients	Cohort	Ohio State University cohort	USA	Trans-ethnic	366	2.7	51	Women	Non-Hispanic white 157 (86.3%), Black/Asian 25 (13.7%)	NO DATA	All stages	All subtypes	NA				Genontyping by SNaPshot assay	IL-6	rs1800795	C	Odss ratio Pearson´s chi squared test and logistic regresion	0.001	2.23	1.06	4.71	NA	NO DATA	NO DATA	NO DATA	Age at diagnosis, race (non-Hispanic white, black, or Asian), stage at diagnosis (1, 2, or 3+), grade (1, 2, or 3), and receptor positivity (ER, PR, and HER2)	Yes	Yes	NO DATA	NO DATA	Yes	Yes	Moderate	Metastasis not recurrence
						VUMC	USA	Trans-ethnic	988	NO DATA	51	Both	Non-Hispanic white 239 (89.2%), Black 28 (10.4%), Other 1 (0.4%)	NO DATA	Not only BC	NO DATA					Genotyping by Sequenom MassARRAY iPLEX platform				Odds ratio Fisher´s exact tests	0.004	1.52	1.14	2.02	NA	NO DATA	NO DATA	NO DATA	NO DATA								Metastasis not recurrence
19	Mahalakshmi Kumaran	2017	Scientific Reports Nature	Germline copy number variations are associated with breast cancer risk and prognosis	Cohort	No name	Canada	Alberta	770	8.96	52	Women	Caucasian	NO DATA	I-III	NO DATA	Registry	NA	NA	Registry	Whole Genome	ZFP14	chr19:36846012–36847567	CNV gain	Hazard ratio	0.00478	2.38	1.3	4.36	NA	NO DATA	NO DATA	NO DATA	NO DATA	Yes	Yes	NO DATA	NO DATA	Yes (CNVs)	Yes	Moderate	BC risk and OS and RFS
																						JAK1	chr1:65393459-65410228	CNV gain	Hazard ratio	0.0107	3.24	1.31	8.01	NA	NO DATA	NO DATA	NO DATA									BC risk and OS and RFS
																						GSTM2	chr1:110225034-110226615	CNV gain	Hazard ratio	0.013	1.81	1.13	2.89	NA	NO DATA	NO DATA	NO DATA									BC risk and OS
																						RAB40B	chr17:80646036-80647251	CNV gain	Hazard ratio	0.016	2.57	1.19	5.52	NA	NO DATA	NO DATA	NO DATA									BC risk and OS
																						HLA-DRB5, HLA-DRB6	chr6:32487136-32497161	CNV gain	Hazard ratio	0.0225	0.59	0.38	0.93	NA	NO DATA	NO DATA	NO DATA									BC risk and OS
																						EYA1	chr8:72213838-72215337	CNV gain	Hazard ratio	0.0309	1.59	1.04	2.43	NA	NO DATA	NO DATA	NO DATA									BC risk and OS
																						LPA	chr6:161032642-161068568	CNV gain	Hazard ratio	0.0313	0.37	0.15	0.91	NA	NO DATA	NO DATA	NO DATA									BC risk and OS and RFS
																						DOCK3	chr3:50951343-50960775	CNV gain	Hazard ratio	0.0318	2.2	1.07	4.52	NA	NO DATA	NO DATA	NO DATA									BC risk and OS
																						ANKS1B	chr12:99796328-99797863	CNV gain	Hazard ratio	0.0335	1.94	1.05	3.57	NA	NO DATA	NO DATA	NO DATA									BC risk and OS
																						CACNA1C	chr12:2254285-2256046	CNV gain	Hazard ratio	0.0349	0.48	0.24	0.95	NA	NO DATA	NO DATA	NO DATA									BC risk and OS
																						PDGFRA	chr4:55111660–55120708	CNV loss	Hazard ratio	0.00658	0.35	0.16	0.74	NA	NO DATA	NO DATA	NO DATA									BC risk and OS and RFS
																						RAB11FIP3	chr16:515664-536683	CNV loss	Hazard ratio	0.0166	0.43	0.22	0.86	NA	NO DATA	NO DATA	NO DATA									BC risk and OS
																						BAGE	chr21:11053457-11069332	CNV loss	Hazard ratio	0.0201	0.4	0.19	0.87	NA	NO DATA	NO DATA	NO DATA									BC risk and OS
																						SGCZ	chr8:14284477-14288732	CNV loss	Hazard ratio	0.0241	0.27	0.08	0.84	NA	NO DATA	NO DATA	NO DATA									BC risk and OS
																						POM121c	chr7:75044860-75054268	CNV loss	Hazard ratio	0.0477	0.2	0.06	0.98	NA	NO DATA	NO DATA	NO DATA									BC risk and OS
																						ZFP14	chr19:36846012–36847567	CNV gain	Hazard ratio	0.000382	2.89	1.61	5.19	NA	NO DATA	NO DATA	NO DATA									BC risk and RFS and OS
																						SORBS2+	chr4:186629984-186634169	CNV gain	Hazard ratio	0.0135	3.54	1.3	9.64	NA	NO DATA	NO DATA	NO DATA									BC risk and RFS. The gene has both gain and loss associated with recurrence free survival when compared to diploid.
																						LCE3C	chr1:152572873-152574332	CNV gain	Hazard ratio	0.0194	1.75	1.1	2.81	NA	NO DATA	NO DATA	NO DATA									BC risk and RFS
																						OR2T11	chr1:248787969-248794876	CNV gain	Hazard ratio	0.0264	2.09	1.09	4	NA	NO DATA	NO DATA	NO DATA									BC risk and RFS
																						MUC20	chr3:195456468-195461506	CNV gain	Hazard ratio	0.0346	0.62	0.39	0.97	NA	NO DATA	NO DATA	NO DATA									BC risk and RFS
																						JAK1	chr1:65393459-65410228	CNV gain	Hazard ratio	0.0347	2.6	1.07	6.47	NA	NO DATA	NO DATA	NO DATA									BC risk and RFS and OS
																						LPA	chr6:161032642-161068568	CNV gain	Hazard ratio	0.00508	0.31	0.13	0.7	NA	NO DATA	NO DATA	NO DATA									BC risk and RFS and OS
																						LGALS9B	chr17:20346165-20366887	CNV gain	Hazard ratio	0.0352	2.27	1.06	4.87	NA	NO DATA	NO DATA	NO DATA									BC risk and RFS
																						PDGFRA	chr4:55111660-55120708	CNV loss	Hazard ratio	0.00792	0.42	0.22	0.8	NA	NO DATA	NO DATA	NO DATA									BC risk and RFS and OS
																						MLIP	chr6:53931117-53933601	CNV loss	Hazard ratio	0.0253	0.62	0.4	0.94	NA	NO DATA	NO DATA	NO DATA									BC risk and RFS
																						SORBS2+	chr4:186629984-186634169	CNV loss	Hazard ratio	0.0365	1.93	1.04	3.58	NA	NO DATA	NO DATA	NO DATA									BC risk and RFS. The gene has both gain and loss associated with recurrence free survival when compared to diploid.
20	Xiaorong Zhong	2016	PLOS ONE	Prevalence and Prognostic Role of BRCA1/2 Variants in Unselected Chinese Breast Cancer Patients	Cohort	No name	China	Chinese	426	3.28	48	Female 99.8%	Han 99%	0.436	0-III	All subtypes	Registry	NA	NA	Registry	Next generation sequencing	BRCA1	Group of mutations	NA	Hazard ratio	0.02	4.52	1.31	15.61	0.17	2.72	0.65	11.44	NO DATA	Yes	Yes	5-10%	NO DATA	Yes (mutations)	Yes	Moderate	Stage 0-II (Univariate, not adjusted)
																						BRCA1	Group of mutations	NA	Hazard ratio	0.04	5.4	1.12	26	0.21	3.62	0.47	27.63									N0
21	Sinead Toomey	2016	Oncotarget Impact Journals	The impact of ERBB-family germline single nucleotide polymorphisms on survival response to adjuvant trastuzumab treatment in HER2-positive breast cancer	Cohort	No name	Ireland	Irish	194	11.67	51	Women	Irish	NO DATA	I-II	HER2+	Registry	NA	NA	Registry	Illumina MiSeq Sequencer	EGFR	N158N	C	Hazard ratio	0.0048	4.01	1.53	10.69	0.03	3.47	1.11	10.9	Age, tumor grade, ER state, LN state.	Yes	Yes	NO DATA	NO DATA	NO DATA	Yes	Low
																						EGFR	I655V	G	Hazard ratio	0.05	1.79	1	3.19	0.04	2.36	1.02	5.5
																						EGFR	D994D	C	Hazard ratio	0.02	2.6	1.16	5.82	0.02	3.46	1.1	10.9
																						EGFR	T903T	T	Hazard ratio	0.00494	3.52	1.38	8.97	0.01	6.51	1.98	21.36
22	Rasa Ugenskienė	2016	Biomarkers	The contribution of SIPA1 and RRP1B germline polymorphisms to breast cancer phenotype, lymph node status and survival in a group of Lithuanian young breast cancer patients	Cohort	No name	Lithuania	Lithuanian	100	5.83	NO DATA	Women	Lithuanian	0	I-II	All subtypes	NA	Registry	Registry	Registry	PCR-RFLP	SIPA1	rs3741378	T	Hazard ratio	0.042	2.495	1.034	6.023	0.002	5.169	1.814	14.726	Age at diagnosis, ER, PR, and HER2 receptors, tumor size, tumor grade and lymph node status.	Yes	Yes	NO DATA	NO DATA	NO DATA	Yes	Low	Shorter PFS vs CC genotype
																						SIPA1	rs3741378	T	Hazard ratio	0.009	3.383	1.348	8.489	0.001	6.526	2.15	19.808									Shorter MFS vs CC genotype
23	Yu-Mian Jia	2015	PLOS ONE	Association of Genetic Polymorphisms in CDH1 and CTNNB1 with Breast Cancer Susceptibility and Patients' Prognosis among Chinese Han Women	Cohort	No name	China	Chinese	1091	3.4	49.26	Women	Chinese Han	0.4879	All stages	All subtypes	Registry	NA	NA	Registry	Genotyping by ABI 7900HT Real-Time PCR System	CDH1	rs13689	CC	Hazard ratio	NO DATA	1.73	1.01	2.96	0.4339	0.57	0.14	2.35	ER status, PR status, Her2 status, tumor size, clinical stage, lymphnode metastasis, chemotherapy and endocrine therapy status	Yes	Yes	1.46% (17 cases)	NO DATA	Yes (Cross-validation consistency)	Yes	Low	Minor allele homozygotes. Unfavorable event-free survival.
																						CDH1	rs13689	CT	Hazard ratio	0.0233	1.85	1.09	3.15	0.5043	0.62	0.15	2.54
																						CDH1	haplotype TGC	TGC	Hazard ratio	NO DATA	1.49	1.02	2.18	0.3558	1.36	0.71	2.59									Unfavorable event-free survival.
																						CDH1	rs4783689	C	Hazard ratio	0.2863	0.62	0.44	0.87	0.3264	0.75	0.42	1.33									Favorable event-free survival.
																						CDH1	rs4783689	C	Hazard ratio	0.0045	0.63	0.46	0.87	0.2863	0.75	0.44	1.27
																ER+						CDH1	rs7186053	A	Hazard ratio	0.0146	0.52	0.3	0.87	0.0039	0.29	0.12	0.67									STRATIFIED ANALYSIS Favorable event-free survival among patients with estrogen receptor (ER)-positive, progesterone receptor (PR)-positive or lymph node metastasis negative patients
																PR+						CDH1	rs7186053	A	Hazard ratio	0.0379	0.53	0.29	0.96	0.051	0.42	0.18	1
															Lymph node metastasis							CDH1	rs7186053	A	Hazard ratio	0.0086	0.44	0.24	0.81	0.0397	0.35	0.13	0.95
																						CDH1	rs7200690	T	Hazard ratio	0.0179	5.05	1.32	19.27	0.0211	10.3	1.42	74.73									STRATIFIED ANALYSIS Worse event-free survival among patients with clinical stage 0-I tumors.
																						CDH1	rs7198799	T	Hazard ratio	0.0226	5.97	1.29	27.7	0.0389	10.91	1.13	105.34									STRATIFIED ANALYSIS Worse event-free survival among patients with clinical stage 0-I tumors.
																						CTNNB1	rs4533622	A	Hazard ratio	0.0456	0.59	1.03	22.7	0.058	9.04	0.93	87.96									STRATIFIED ANALYSIS Worse event-free survival among patients with clinical stage 0-I tumors.
24	Ke-Da Yu	2015	Oncotarget Impact Journals	Host genotype and tumor phenotype of chemokine decoy receptors integrally affect breast cancer relapse	Cohort	No name	China	Chinese	463	4	53	Women	Han Chinese	NO DATA	I-II	All subtypes	Registry	NA	NA	NA	PCR Sequencing	DARC	rs12075	A	Hazard ratio	0.03	0.95	0.91	0.99	NA	NO DATA	NO DATA	NO DATA	NO DATA	Yes	Yes	NO DATA	NO DATA	Yes (re-genotyping)	Yes	Moderate
																						D6	rs2228468	C	Hazard ratio	0.002	0.93	0.9	0.98	NA	NO DATA	NO DATA	NO DATA
25	Dan-Na Chen	2015	PLOS ONE	A Prospective Evaluation of the Association between a Single Nucleotide Polymorphism rs3775291 in Toll-Like Receptor 3 and Breast Cancer Relapse	Cohort	No name	China	Chinese	715	6.12	50.34	Women	Chinese	46.43	I-II	All subtypes	Registry	NA	NA	Registry	Sequencing	TLR3	rs3775291	AA	Hazard ratio	<0.01	2.04	1.24	3.35	<0.01	3.53	1.98	6.31	Lymph node status, tumor size, chemotherapy, endocrine therapy, and ER, PR, and HER2 statuses	Yes	Yes	9.45	NO DATA	Yes (genotyping)	Yes	Low
																						TLR1	rs4833095	TT	Hazard ratio	>0.05	NA	NA	NA	NA	NA	NA	NA
26	Petra Seibold	2015	BMC Cancer	A polymorphism in the base excision repair gene PARP2 is associated with differential prognosis by chemotherapy among postmenopausal breast cancer patients	Retrospective	MARIE and BCAC	Germany	German	1408	6	NO DATA	Women	NO DATA	100	All stages	All subtypes	NA	NA	NA	Registry	PCR	PARP2	rs878156	G	Hazard ratio	NA	NO DATA	NO DATA	NO DATA	0.002	0.75	0.53	1.07	Tumour size, nodal status, baseline metastases status, tumour grade, estrogen/progesterone receptor status, mode of detection, smoking status, menopausal hormone therapy as well as radiotherapy and (anthracycline- based) chemotherapy (including both adjuvant and neoadjuvant treatment).	Yes	Yes	NO DATA	NO DATA	Yes (BCAC)	Yes	Low	With chemotherapy
																						PARP2	rs878156	G	Hazard ratio	NA	NO DATA	NO DATA	NO DATA	0.002	1.42	1.08	1.85									Without chemotherapy
27	Erika Korobeinikova	2015	BMC Genetics	The prognostic value of IL10 and TNF alpha functional polymorphisms in premenopausal early-stage breast cancer patients	Cohort	No name	Lithuania	Lithuanian	100	5.83	NO DATA	Women	European	0	I-II	All subtypes	Registry	NA	Registry	Registry	PCR	TNFα	rs1800629	A	Hazard ratio	0.02	3.049	1.195	7.778	0.005	4.631	1.587	13.512	Age group (30–40 years, 41–50 years), tumor size (T1, 2), lymph node status (N0, 1), histological grade (G1, 2, 3) and intrinsic subtype (Luminal A, Luminal B, HER2 enriched, Basal-like)	Yes	Yes	NO DATA	NO DATA	NO DATA	Yes	Low	Progression-free survival
																						TNFα	rs1800629	A	Hazard ratio	0.045	2.819	1.021	7.78	0.01	4.708	1.445	15.345									Metastasis-free survival
																						TNFα	rs1800629	A	Hazard ratio	0.057	3.096	0.967	9.909	0.037	4.829	1.098	21.243									Overall survival
28	C. Vulsteke	2014	Breast Cancer Research and Treatment	Impact of genetic variability and treatment-related factors on outcome in early breast cancer patients receiving (neo-) adjuvant chemotherapy with 5-fluorouracil, epirubicin and cyclophosphamide, and docetaxel	Retrospective	No name	Belgium	NO DATA	991	5.2	50.3	Not specified	NO DATA	NO DATA	I-III	All subtypes	Registry	Registry	Registry	Registry	Sequencing	CYP2C9	rs1057910	C	Hazard ratio	NA	NO DATA	NO DATA	NO DATA	>0.001	30.4	6.1	151.5	Subtype, stage, White Blood Cell Count, and hemoglobin.	Yes	Yes	NO DATA	NO DATA	NO DATA	Yes	Moderate	Worse BCSS
																						ABCB1	rs2032582	T	Hazard ratio	NA	NO DATA	NO DATA	NO DATA	0.021	0.5	0.3	0.9									Better BCSS
																						CYP2C9	rs1057910	C	Hazard ratio	NA	NO DATA	NO DATA	NO DATA	0.002	10.9	2.5	47.9									Worse RFI
																						CYBA	rs4673	T	Hazard ratio	NA	NO DATA	NO DATA	NO DATA	0.006	1.8	1.2	2.7									Worse RFI
																						UGT2B7	rs3924194	G	Hazard ratio	NA	NO DATA	NO DATA	NO DATA	0.023	3.4	1.2	9.7									Worse RFI
29	Kari J Kurppa	2014	PLOS ONE	ERBB4 promoter polymorphism is associated with poor distant disease-free survival in high-risk early breast cancer	Cohort	FinHer	NO DATA	NO DATA	936	5.2	50.8	Women	NO DATA	NO DATA	II-III	PR-	NA	NA	Registry	Registry	Sequencing	ERBB4	rs62626348	T	Hazard ratio	0.298	NO SIGNIFICANCE	NA	NA	NA	NO DATA	NO DATA	NO DATA	NO DATA	Yes	Yes	NO DATA	NO DATA	NO DATA	Yes	Moderate	No association
									932													ERBB4	rs62626347	T	Hazard ratio	0.017	2.86	1.15	6.67	NA	NO DATA	NO DATA	NO DATA									Poor survival
30	Soo-Youn Lee	2014	European Journal of Cancer	Genetic polymorphisms of SLC28A3, SLC29A1 and RRM1 predict clinical outcome in patients with metastatic breast cancer receiving gemcitabine plus paclitaxel chemotherapy	Cohort	No name	Korea	Korean	85	NO DATA	49	Women	Asian	60	IV	No HER+	Registry	NA	NA	Registry	Genotyping by MassArray platform	SLC28A3	rs7867504	T	Hazard ratio	0.027	2.6	1.1	6.3	NA	NO DATA	NO DATA	NO DATA	NO DATA	Yes	Yes	NO DATA	NO DATA	NO DATA	Yes	Moderate	Associated with OS
																						SLC29A1	GA haplotype	NA	Hazard ratio	0.03	3.391	1.13	10.19	NA	NO DATA	NO DATA	NO DATA									Shorter OS
31	Mala Pande	2014	Breast Cancer Research and Treatment	Association between germline single nucleotide polymorphisms in the PI3K-AKT-mTOR pathway, obesity, and breast cancer disease-free survival	Retrospective Cohort	The Early Stage Breast Cancer Repository (ESBCR)	USA	Trans-ethnic	1019	NO DATA	No mean, 38.1% <50 and 61.9% >50.	Women	72% were non-Hispanic white, 13% were African American, 11% were Hispanic and 3% were of unknown race/ethnicity.	NO DATA	I-II	All subtypes	Registry	NA	NA	Registry	Genotyping	ADIPOQ	rs1063539	C	Hazard ratio	NA	NO DATA	NO DATA	NO DATA	0.02	0.4	0.19	0.86	Race/ethnicity, age at diagnosis, tumor stage and treatment.	Yes	Yes	NO DATA	NO DATA	NO DATA	Yes	Low	Improved DFS
																						LEPR	rs11585329	T	Hazard ratio	NA	NO DATA	NO DATA	NO DATA	0.04	0.72	0.53	0.98									Improved DFS
																						TSC1	rs2519757	C	Hazard ratio	NA	NO DATA	NO DATA	NO DATA	0.03	0.29	0.09	0.91									Improved DFS
																						IGF1	rs1520220	C	Hazard ratio	NA	NO DATA	NO DATA	NO DATA	0.001	1.56	1.21	2									Worse DFS
																						PIK3CA	rs2677760	C	Hazard ratio	NA	NO DATA	NO DATA	NO DATA	0.03	1.43	1.07	1.92									Worse DFS
32	Yan Li	2013	PLOS ONE	Association study of germline variants in CCNB1 and CDK1 with breast cancer susceptibility, progression, and survival among Chinese Han women	Case-control	No name	China	Chinese	1204	NO DATA	48.98	Women	Chinese Han	47.84	All stages	All subtypes	Registry	NA	NA	Registry	PCR Genotyping	CDK1	rs1871446 (C>T)	T	Hazard ratio	0.001	4.323	1.763	10.599	NA	NO DATA	NO DATA	NO DATA	PR-negative status, Her2-positive status, tumor size >2cm, lymph node metastasis and clinical stage II-IV	Yes	Yes	0.1088	NO DATA	NO DATA	Yes	Low	Unfavorable event-free survival.
																						CDK1	diplotype ATATG/ATATG		Hazard ratio	0.009	3.022	1.309	6.975	NA	NO DATA	NO DATA	NO DATA									Worse event-free survival compared with common diplotype GCACG/ATATT.
																						CDK1	diplotype CTACG/ATATT		Hazard ratio	0.027	0.471	0.242	0.917	NA	NO DATA	NO DATA	NO DATA									Favorable event-free survival when compared with common diplotype.
																						CDK1	diplotype GTGCT/ATACT		Hazard ratio	0.027	0.205	0.05	0.838	NA	NO DATA	NO DATA	NO DATA									Better event-free survival.
33	Yadav Sapkota	2013	PLOS ONE	Germline DNA copy number aberrations identified as potential prognostic factors for breast cancer recurrence	Cohort	No name	Canada	Caucasians	369	6.3	51	Women	Caucasian	47.1	I-III	All subtypes	Registry	NA	NA	Registry	Whole Genome Genotyping	CLEC18A/PDPR	chr16:70151941-70198049		Hazard ratio	1.02e-10	4.49	2.73	7.4	9.35e-07	3.88	2.35	6.41	Tumor stage and grade.	Yes	Yes	NO DATA	NO DATA	Yes (independent genotyping platforms)	Yes	Low	Chromosomal aberrations statistically significantly associated with BCR
																						Intergenic	chr17:30556456-30568424		Hazard ratio	7.79e-06	2.2	1.54	3.13	0.02	2.09	1.46	2.99									Chromosomal aberrations statistically significantly associated with BCR
																						Intergenic	chr11:64169509-64201009		Hazard ratio	5.46e-06	2.98	1.82	4.88	0.02	2.28	1.35	3.85									Chromosomal aberrations statistically significantly associated with BCR
																						SUZ12/LRRC37B/SH3GL1P1	chr17:30292345-30436095		Hazard ratio	6.9e-06	2.19	1.54	3.12	0.02	2.06	1.45	2.94									Chromosomal aberrations statistically significantly associated with BCR
																						Intergenic	chr19:53519960-53538651		Hazard ratio	1.44e-05	2.35	1.58	3.5	0.02	2.34	1.56	3.51									Chromosomal aberrations statistically significantly associated with BCR
																						Intergenic	chr11:64228316-64258125		Hazard ratio	1.39e-05	2.52	1.64	3.88	0.02	2.08	1.32	3.26									Chromosomal aberrations statistically significantly associated with BCR
																						BAD/KCNK4/ GPR137/ESRRA/ CCDC88B	chr11:64048319-64143935		Hazard ratio	2.01e-05	2.74	1.69	4.43	0.03	2.15	1.29	3.58									Chromosomal aberrations statistically significantly associated with BCR
																						NA	chr16:70151941-70198049		Hazard ratio	2.95e-06	4.92	2.35	10.33	NO DATA	4.95	2.3	10.67									Association of top seven CNAs with BCR in 208 luminal A samples.
																						NA	chr17:30556456-30568424		Hazard ratio	0.000813	2.23	1.38	3.6	NO DATA	2.01	1.22	3.29									Association of top seven CNAs with BCR in 208 luminal A samples.
																						NA	chr11:64169509-64201009		Hazard ratio	0.000908	3.07	1.53	6.17	NO DATA	1.89	0.89	4.05									Association of top seven CNAs with BCR in 208 luminal A samples.
																						NA	chr17:30292345-30436095		Hazard ratio	0.00067	2.26	1.39	3.65	NO DATA	1.98	1.21	3.25									Association of top seven CNAs with BCR in 208 luminal A samples.
																						NA	chr19:53519960-53538651		Hazard ratio	1.83e-07	3.75	2.2	6.39	NO DATA	4.08	2.29	7.26									Association of top seven CNAs with BCR in 208 luminal A samples.
																						NA	chr11:64228316-64258125		Hazard ratio	3.25e-07	3.84	2.2	6.69	NO DATA	2.82	1.54	5.14									Association of top seven CNAs with BCR in 208 luminal A samples.
																						NA	chr11:64048319-64143935		Hazard ratio	0.000389	3.15	1.61	6.14	NO DATA	2.03	0.98	4.19									Association of top seven CNAs with BCR in 208 luminal A samples.
34	Axel Muendlein	2013	J Cancer Res Clin Oncol	Association of a common genetic variant of the IGF-1 gene with event-free survival in patients with HER2-positive breast cancer	Cohort	No name	Austria	Austrian	161	4.2	58.4	Women	White	68.9	All stages	HER2+	Registry	NA	NA	Registry	Genotyping by SNaPshot assay	IGF1	rs2946834	A	Hazard ratio	0.027	3.06	1.14	8.22	0.043	1.79	1.02	3.15	TNM stage and age.	Yes	Yes	NO DATA	NO DATA	NO DATA	Yes	Low	Decreased event-free survival
																						IGF1	rs6220	A	Hazard ratio	0.288	1.39	0.76	2.52	NA	NO DATA	NO DATA	NO DATA
																						IGF1	rs1520220	G	Hazard ratio	0.219	1.47	0.8	2.71	NA	NO DATA	NO DATA	NO DATA
																						IGF1	rs5742694	C	Hazard ratio	0.398	1.3	0.71	2.38	NA	NO DATA	NO DATA	NO DATA
																						IGF1	rs5742678	C	Hazard ratio	0.317	1.35	0.75	2.43	NA	NO DATA	NO DATA	NO DATA
35	Gudrun Absenger	2013	Molecular Carcinogenesis	A common and functional gene variant in the vascular endothelial growth factor a predicts clinical outcome in early-stage breast cancer	Retrospective	No name	Austria	Austrian	539	5.07	57	Women	Caucasian	66	I-III	All subtypes	Registry	NA	NA	NA	Genotyping	VEGF-A	rs3025039 C > T	T	Hazard ratio	0.038	1.845	1.035	3.29	0.043	1.88	1.02	3.465	Menopausal status, stage, grading, receptor status, Her-2 neu status, and adjuvant therapy.	Yes	Yes	7.1	The investigator responsible for genotyping (WR) was blinded to the clinical data.	NO DATA	Yes	Low	Decreased recurrence-free survival
																						CCND1	rs9344 G > A	A	Hazard ratio	0.068	2.379	0.841	6.728	NA	NA	NA	NA									Patients carrying at least one A-allele in CCND1 rs9344 G > A showed a trend towards decreased recurrence-free survival in univariate analysis (HR 2.379; 95% CI 0.841–6.728; P ¼ 0.068).
36	James L. Murray	2013	Breast Cancer Research and Treatment	Prognostic value of single nucleotide polymorphisms of candidate genes associated with inflammation in early stage breast cancer	Retrospective Cohort	No name	USA	Trans-ethnic	997	18	NO MEAN	Not specified	74.12% Caucasians, 14.14% African Americans, 11.74% Hispanics.		I-II	All subtypes	Registry	NA	NA	NA	Genotyping by Illumina Golden Gate technology	NFKB1	rs3774932	A	Hazard ratio	0.01	0.68	0.48	0.97	0.02	2.52	0.91	2.89	Stage, age, and treatment	Yes	Yes	NO DATA	Blinded duplicate samples for genotyping.	NO DATA	Yes	Moderate	Caucasian patients
																						NFKB1	rs230533	A	Hazard ratio	0.01	1.5	1.11	2.01	NO DATA	NO SIGNIFICANCE	NA	NA									Caucasian patients
																						NFKB1	rs4648058	C	Hazard ratio	0.05	1.34	1	1.8	NO DATA	NO SIGNIFICANCE	NA	NA									Caucasian patients
																						NFKB1	rs230521	C	Hazard ratio	0.01	0.66	0.47	0.91	NO DATA	NO SIGNIFICANCE	NA	NA									Caucasian patients
																						NFKB1	rs230496	G	Hazard ratio	0.03	0.65	0.48	0.9	NO DATA	NO SIGNIFICANCE	NA	NA									Caucasian patients
																						NFKB1	rs230532	A	Hazard ratio	0.01	1.47	1.09	1.97	0.001	1.41	1.02	1.95									Caucasian patients
																						IL-4	rs2070874	A	Hazard ratio	0.03	1.49	1.03	2.15	NO DATA	NO SIGNIFICANCE	NA	NA									Caucasian patients
																						IL-4	rs2243268	C	Hazard ratio	0.04	1.45	1.01	2.08	NO DATA	NO SIGNIFICANCE	NA	NA									Caucasian patients
																						IL-4	rs2243267	C	Hazard ratio	0.04	1.48	1.02	2.13	NO DATA	NO SIGNIFICANCE	NA	NA									Caucasian patients
																						IL-4	rs2243270	G	Hazard ratio	0.05	1.42	1.01	2.02	NO DATA	NO SIGNIFICANCE	NA	NA									Caucasian patients
																						IL-13	rs1800925	A	Hazard ratio	0.04	1.48	1.02	2.13	0.034	1.47	1.04	2.07									Caucasian patients
																						IL-13	rs1295686	A	Hazard ratio	0.05	1.42	1.01	2.02	NO DATA	NO SIGNIFICANCE	NA	NA									Caucasian patients
																						NFKB1	rs3774932	A	Hazard ratio	0.03	2.52	0.91	2.89	0.02	2.52	0.91	2.89									African-American and Hispanic patients
																						TNF	rs1799964	C	Hazard ratio	0.07	2.52	0.91	6.95	NO DATA	NO SIGNIFICANCE	NA	NA									African-American and Hispanic patients
																						IL4R	rs3024543	A	Hazard ratio	0.09	1.57	0.93	2.64	0.03	1.57	0.93	2.64									African-American and Hispanic patients
37	Peter A Fasching	2012	Human Molecular Genetics	The role of genetic breast cancer susceptibility variants as prognostic factors	Cohort	No name	Germany	NO DATA	20073	6.4	NO DATA	Women	NO DATA	NO DATA	I-III	All subtypes	Registry	NA	NA	Registry	Genotyping by Taqman and iPlex assays	TOX3	rs3803662	T	Hazard ratio	NA	NO DATA	NO DATA	NO DATA	0.0002	1.21	1.09	1.35	Age at diagnosis (continuous) and categorical variables for tumor size, lymph nodes status and grade. We also fitted additional models including ER status as a covariate, and fitted separate models for ER-positive and ER-negative cases.	Yes	Yes	NO DATA	NO DATA	NO DATA	No	Moderate	The rare (T) allele of rs3803662 was associated with a poorer survival in all models.
																						TOX3	rs3803662	T	Hazard ratio	NA	NO DATA	NO DATA	NO DATA	0.0003	1.29	1.12	1.47
																						LSP1	rs3817198	C	Hazard ratio	NA	NO DATA	NO DATA	NO DATA	0.05	0.74	0.54	1									The rare CC homozygote genotype was associated with a lower mortality tumors compared with the common genotype (TT).
38	Ji-Yuan Han	2012	PLOS ONE	Association of germline variation in CCNE1 and CDK2 with breast cancer risk, progression and survival among Chinese Han women	Case-control	No name	China	Chinese	1207	3.4	48.98	Women	Chinese Han	47.8	All stages	All subtypes	Registry	NA	NA	Registry	Genotyping by Taqman Assay	CCNE1	haplotype CCGTC	TCGTC	Hazard ratio	0.018	0.53	0.32	0.9	NA	NO DATA	NO DATA	NO DATA	NO DATA	Yes	Yes	10.94	NO DATA	NO DATA	Yes	Moderate	Correlated with a favorable event-free survival when compared to common haplotype TCGTC.
																						CCNE1	haplotype CCGTC	TCGTC	Hazard ratio	0.021	0.55	0.33	0.91	NA	NO DATA	NO DATA	NO DATA									Correlated with a favorable event-free survival when compared to all the other haplotypes.
																						CCNE1	rs3218038 (G>T)	T	Hazard ratio	0.033	2.06	1.06	3.99	NA	NO DATA	NO DATA	NO DATA									Unfavorable event-free survival compared with those carrying common G allele among patients with aggressive tumours (in tumour size.2 cm group).
																						CCNE1	rs3218038 (G>T)	T	Hazard ratio	0.019	2.41	1.15	5.03	NA	NO DATA	NO DATA	NO DATA									Unfavorable event-free survival compared with those carrying common G allele in positive lymph node metastasis group.
																						CCNE1	rs3218038 (G>T)	T	Hazard ratio	0.027	2.03	1.09	3.79	NA	NO DATA	NO DATA	NO DATA									Unfavorable event-free survival compared with those carrying common G allele in clinical stage II-IV group.
39	Else Maae	2012	Anticancer Research	Prognostic impact of VEGFA germline polymorphisms in patients with HER2-positive primary breast cancer	Cohort	No name	Denmark	Danish	116	5.1	54.5	Women	NO DATA	NO DATA	All stages	All subtypes	Registry	Registry	Registry	Registry	TaqMan® SNP Genotyping Assay	VEGFA	rs699947	A	Chi-square test or Fisher’s exact test.	0.028	NA	NA	NA	0.056	1.91	0.98	3.72	Genotype, adjuvant chemotherapy, tumour size (≤/>20 mm), axillary lymph node status and dichotomized histopathological tumour grade (grade 1 versus grade 2, 3 and unknown).	Yes	Yes	NO DATA	NO DATA	NO DATA	Yes	Moderate	In univariate analysis the -2578CC genotype conferred an inferior prognosis compared to -2578CA and -2578AA combined.
																						VEGFA	rs1570360	A	Chi-square test or Fisher’s exact test.	0.968	NA	NA	NA	0.941	1.03	0.53	2
																						VEGFA	rs2010963	C	Chi-square test and Hazard ratio	0.001	NA	NA	NA	0.04	2.57	1.05	6.3									The 634CC genotype was a significant predictor of adverse prognosis compared to -634CG and -634GG, both individually (p=0.006) and when combined (p=0.001)
																						VEGFA	rs25648	T	Chi-square test or Fisher’s exact test.	0.015	NA	NA	NA	0.07	2.19	0.94	5.09
																						VEGFA	rs3025039	T	Chi-square test or Fisher’s exact test.	0.878	NA	NA	NA	0.765	0.88	0.38	2.03
40	Ke-Da Yu	2012	Cancer Research	Genetic variants in oxidative stress-related genes predict chemoresistance in primary breast cancer: a prospective observational study and validation	Cohort	No name	China	Chinese	806	4.33	50	Women	Chinese Han	43.4	I-II	All subtypes	Registry	NA	NA	Registry	Genotyping by 2-pex SNPstream Platform	NQO2	I-29/D	I-29	Hazard ratio	NA	NO DATA	NO DATA	NO DATA	0.062	NO SIGNIFICANCE (0.062)	NA	NA	Lymph node status (P < 0.0001), tumor size (P < 0.0001), ER (P < 0.0001), HER2 (P ¼ 0.004), and chemotherapy (P¼0.0005).	Yes	Yes	NO DATA	NO DATA	Yes (Validation study)	Yes	Low
																						NQO2	rs2071002	C	Hazard ratio	NA	NO DATA	NO DATA	NO DATA	0.003	0.3	0.14	0.66
																						NQO2	rs1143684	C	Hazard ratio	NA	NO DATA	NO DATA	NO DATA	0.67	NO SIGNIFICANCE (0.670)	NA	NA
																						NQO2	rs9501910	C	Hazard ratio	NA	NO DATA	NO DATA	NO DATA	0.023	1.59	1.07	2.37
																						GSTM1	Null/present	NA	Hazard ratio	NA	NO DATA	NO DATA	NO DATA	0.001	0.25	0.1	0.56
																						NA	Genetic score	NA	Hazard ratio	NA	NO DATA	NO DATA	NO DATA	0.005	0.25	0.1	0.63
41	Yee Soo Chae	2011	Med Oncol	VARS2 V552V variant as prognostic marker in patients with early breast cancer	Cohort	No name	Korea	Korean	240	4.45	48	Women	Korean	41.7	I-IIIA	All subtypes	Registry	Registry	Registry	Registry	Genotyping by Sequenom MassARRAY	MGMT	rs1625649	T	Log-rank test	0.564	NA	NA	NA	NO DATA	NO DATA	NO DATA	NO DATA	Age, stage, histological grade, and ER, P53, and HER2 status.	Yes	Yes	NO DATA	NO DATA	NO DATA	Yes	Moderate	DFS
																						MGMT	rs1625649	T	Log-rank test	0.821	NA	NA	NA	NO DATA	NO DATA	NO DATA	NO DATA									DDFS
																						MGMT	rs1625649	T	Log-rank test	0.803	NA	NA	NA	NO DATA	NO DATA	NO DATA	NO DATA									OS
																						NBN	rs1063045	T	Log-rank test	0.865	NA	NA	NA	NO DATA	NO DATA	NO DATA	NO DATA									DFS
																						NBN	rs1063045	T	Log-rank test	0.583	NA	NA	NA	NO DATA	NO DATA	NO DATA	NO DATA									DDFS
																						NBN	rs1063045	T	Log-rank test	0.31	NA	NA	NA	NO DATA	NO DATA	NO DATA	NO DATA									OS
																						XRCC1	rs25487	A	Log-rank test	0.883	NA	NA	NA	NO DATA	NO DATA	NO DATA	NO DATA									DFS
																						XRCC1	rs25487	A	Log-rank test	0.458	NA	NA	NA	NO DATA	NO DATA	NO DATA	NO DATA									DDFS
																						XRCC1	rs25487	A	Log-rank test	0.682	NA	NA	NA	NO DATA	NO DATA	NO DATA	NO DATA									OS
																						ERCC2	rs1052555	T	Log-rank test	NO DATA	NA	NA	NA	NO DATA	NO DATA	NO DATA	NO DATA
																						ERCC4	rs1799801	C	Log-rank test	0.637	NA	NA	NA	NO DATA	NO DATA	NO DATA	NO DATA									DFS
																						ERCC4	rs1799801	C	Log-rank test	0.226	NA	NA	NA	NO DATA	NO DATA	NO DATA	NO DATA									DDFS
																						ERCC4	rs1799801	C	Log-rank test	0.041	NA	NA	NA	NO DATA	NO DATA	NO DATA	NO DATA									OS
																						RFC4	rs187868	C	Log-rank test	0.607	NA	NA	NA	NO DATA	NO DATA	NO DATA	NO DATA									DFS
																						RFC4	rs187868	C	Log-rank test	0.419	NA	NA	NA	NO DATA	NO DATA	NO DATA	NO DATA									DDFS
																						RFC4	rs187868	C	Log-rank test	0.93	NA	NA	NA	NO DATA	NO DATA	NO DATA	NO DATA									OS
																						VARS2	rs2074511	G	Log-rank test and Hazard ratio	0.055	NA	NA	NA	0.044	0.289	0.86	0.969									DFS
																						VARS2	rs2074511	G	Log-rank test and Hazard ratio	0.09	NA	NA	NA	0.077	0.266	0.058	1.158									DDFS
																						VARS2	rs2074511	G	Log-rank test and Hazard ratio	0.074	NA	NA	NA	0.255	0.415	0.092	1.885									OS
																						VARS2	rs2249459	A	Log-rank test	0.643	NA	NA	NA	NO DATA	NO DATA	NO DATA	NO DATA									DFS
																						VARS2	rs2249459	A	Log-rank test	0.972	NA	NA	NA	NO DATA	NO DATA	NO DATA	NO DATA									DDFS
																						VARS2	rs2249459	A	Log-rank test	0.444	NA	NA	NA	NO DATA	NO DATA	NO DATA	NO DATA									OS
																						MSH2	rs3732183	G	Log-rank test	0.392	NA	NA	NA	NO DATA	NO DATA	NO DATA	NO DATA									DFS
																						MSH2	rs3732183	G	Log-rank test	0.492	NA	NA	NA	NO DATA	NO DATA	NO DATA	NO DATA									DDFS
																						MSH2	rs3732183	G	Log-rank test	0.501	NA	NA	NA	NO DATA	NO DATA	NO DATA	NO DATA									OS
																						POLE	rs5744857	G	Log-rank test	0.055	NA	NA	NA	0.216	1.898	0.688	5.235									DFS
																						POLE	rs5744857	G	Log-rank test	0.023	NA	NA	NA	0.406	0.694	0.293	1.643									DDFS
																						POLE	rs5744857	G	Log-rank test and Hazard ratio	<0.001	NA	NA	NA	0.005	5.445	1.647	18.004									OS
																						POLR2A	rs2228133	C	Log-rank test	0.411	NA	NA	NA	NO DATA	NO DATA	NO DATA	NO DATA									DFS
																						POLR2A	rs2228133	C	Log-rank test	0.753	NA	NA	NA	NO DATA	NO DATA	NO DATA	NO DATA									DDFS
																						POLR2A	rs2228133	C	Log-rank test	0.934	NA	NA	NA	NO DATA	NO DATA	NO DATA	NO DATA									OS
																						POLR2B	rs1713982	A	Log-rank test	0.21	NA	NA	NA	NO DATA	NO DATA	NO DATA	NO DATA									DFS
																						POLR2B	rs1713982	A	Log-rank test	0.272	NA	NA	NA	NO DATA	NO DATA	NO DATA	NO DATA									DDFS
																						POLR2B	rs1713982	A	Log-rank test	0.317	NA	NA	NA	NO DATA	NO DATA	NO DATA	NO DATA									OS
																						POLR2C	rs4937	C	Log-rank test	0.658	NA	NA	NA	NO DATA	NO DATA	NO DATA	NO DATA									DFS
																						POLR2C	rs4937	C	Log-rank test	0.986	NA	NA	NA	NO DATA	NO DATA	NO DATA	NO DATA									DDFS
																						POLR2C	rs4937	C	Log-rank test	0.598	NA	NA	NA	NO DATA	NO DATA	NO DATA	NO DATA									OS
42	Tuomas Heikkinen	2011	Breast Cancer Research	Variants on the promoter region of PTEN affect breast cancer progression and patient survival	Cohort	No name	Finland	Finish	2204	6.92	NO DATA	Not specified	NO DATA	NO DATA	NO DATA	NO DATA	Registry	NA	Registry	Registry		PTEN	903GA	A	Hazard ratio	0.01521	1.9	1.13	3.2	NA	NA	NA	NA	Tumor size, nodal status, primary metastasis, estrogen receptor, progesterone receptor, Her2, p53, Ki67, grade.	Yes	Yes	NO DATA	NO DATA	NO DATA	Yes	Low	Univariate Cox regression survival
										6.92												PTEN	975GC	C	Hazard ratio	0.00357	2.68	1.38	5.21	NA	NA	NA	NA									Univariate Cox regression survival
										6.92												PTEN	1026CA	A	Hazard ratio	0.01829	2.06	1.13	3.7	NA	NA	NA	NA									Univariate Cox regression survival
										6.92												PTEN	COMBINATION OF 3 SNPs	NA	Hazard ratio	2e-05	2.17	1.52	3.1	0.0119	2.01	1.17	3.46									Univariate Cox regression survival
										6.92												PTEN	903GA	A	Hazard ratio	0.00201	2.07	1.31	3.29	NA	NA	NA	NA									Multivariate Cox regression survival
										3.92												PTEN	975GC	C	Hazard ratio	0.0122	2.33	1.2	4.52	NA	NA	NA	NA
										3.92												PTEN	1026CA	A	Hazard ratio	0.28165	1.44	0.74	2.79	NA	NA	NA	NA
										3.92												PTEN	COMBINATION OF 3 SNPs	NA	Hazard ratio	0.00011	1.97	1.4	2.79	0.0381	1.79	1.03	3.11
43	Alexandra J. van den Broek	2011	Breast Cancer Research and Treatment	Association of the germline TP53 R72P and MDM2 SNP309 variants with breast cancer survival in specific breast tumor subgroups	Cohort	No name	Netherlands	NO DATA	295	11.5	44	Women	Caucasian	NO DATA	NO DATA	NO DATA	NA	NA	NA	Registry	TaqMan SNP genotyping assays	TP53	rs1042522 (R72P)	C	Hazard ratio	0.19	0.51	0.18	1.41	0.13	0.45	0.16	1.27	Age, tumor grade, tumor size, lymph node involvement, chemotherapy, hormonal therapy and tumor estrogen receptor expression.	Yes	Yes	NO DATA	NO DATA	NO DATA	Yes	Moderate
																						MDM2	rs2279744 (SNP309)	G	Hazard ratio	0.84	1.07	0.58	1.98	0.5	1.24	0.66	2.33
44	Verena Varadi	2011	Breast Cancer Research and Treatment	Genetic variation in genes encoding for polymerase ζ subunits associates with breast cancer risk, tumour characteristics and survival	Case-control	No name	Sweden	Swedish	783	4.7	58	Women	Swedish	NO DATA	All stages	All subtypes	Registry	Registry	Registry	Registry	PCRbased KASPar SNP Genotyping System	REV3L	rs11153292	C	Hazard ratio	0.01	2.93	1.34	6.44	0.003	3.67	1.56	8.62	Size, grade, regional lymph node metastasis.	Yes	Yes	NO DATA	NO DATA	NO DATA	Yes	Low
																						REV3L	rs462779	C	Hazard ratio	0.16	2.23	0.78	6.38	0.03	3.26	1.11	9.55
45	Elizabeth M Azzato	2010	Journal of the National Cancer Institute	Association Between a Germline OCA2 Polymorphism at Chromosome 15q131 and Estrogen Receptor–Negative Breast Cancer Survival	Retrospective Cohort	SEARCH	NO DATA	European	3761	3	52	Women	99% European	NO DATA	All stages	All subtypes	NA	NA	NA	Registry	Genotyping	OCA2	rs4778137	G	Hazard ratio	NA	NO DATA	NO DATA	NO DATA	1.9e-05	0.76	0.67	0.86	Stage, histopathologic grade, and ER status.	Yes	Yes	NO DATA	Yes (population stratification)	Yes (Validation dataset)	Yes	Low	SEARCH
																						OCA2	rs6626269	G	Hazard ratio	NA	NO DATA	NO DATA	NO DATA	2.2e-06	1.35	1.19	1.52									SEARCH
																						OCA2	rs4778137	G	Hazard ratio	NA	NO DATA	NO DATA	NO DATA	0.54	0.98	0.92	1.05									Validation dataset
																						OCA2	rs6626269	G	Hazard ratio	NA	NO DATA	NO DATA	NO DATA	0.64	1.02	0.94	1.11									Validation dataset
																						OCA2	rs4778137	G	Hazard ratio	NA	NO DATA	NO DATA	NO DATA	0.011	0.93	0.87	0.98									Combined dataset
																						OCA2	rs6626269	G	Hazard ratio	NA	NO DATA	NO DATA	NO DATA	0.0025	1.11	1.04	1.19									Combined dataset
46	Gudrun Knechtel	2010	J Cancer Res Clin Oncol	Analysis of common germline polymorphisms as prognostic factors in patients with lymph node-positive breast cancer	Cohort	No name	Austria	Austrian	216	10	55.87	Women	Caucasian	66.2	II-III	All subtypes	Registry	NA	NA	Registry	Genotyping by Taqman Assay	FAS	1377G>A	A	Risk Ratio of Recurrence	0.012	0.557	0.353	0.878	0.05	0.5	0.309	0.809	Age at diagnosis (<40, 40 to 49, 50 to 59 or ¸60 years), tumor size (T 1, 2, 3, 4), lymph node status (N 0, 1, 2), clinical stage (TNM 1, 2, 3), histological grade (grade 1, 2, 3), estrogen receptor status (ER), progesterone receptor status (PR) and treatment modalities (hormone/tamoxifen therapy, anthracycline/nonanthracycline chemotherapy).	Yes	Yes	NO DATA	NO DATA	NO DATA	Yes	Low	Prolonged disease-free survival
																						FAS	1377G>A	A	Risk Ratio of Recurrence	0.04	0.451	0.496	1.188	NO SIGNIFICANCE (NO DATA)	NO DATA	NO DATA	NO DATA									Overall survival
																						IL10	592C>A	A	Risk Ratio of Recurrence	0.02	1.707	1.087	2.68	0.013	1.841	1.14	2.973									Overall survival
47	Armin Gerger	2010	Breast Cancer Research and Treatment	Association of interleukin-10 gene variation with breast cancer prognosis	Retrospective Cohort	No name	Austria	Austrian	432	6.54	55.9	Women	Caucasian	88	I-III	All subtypes	Registry	NA	NA	Registry	Genotyping by Taqman Assay	IL-10	592C>A	A	Risk Ratio of Recurrence	0.018	1.45	1.06	1.98	0.019	1.48	1.066	2.044	Age at diagnosis, tumor size, lymph node status, clinical stage, histological grade, estrogen receptor status, progesterone receptor status, and treatment modalities.	Yes	Yes	0	NO DATA	Yes (validated phenotypes)		Low
																						MTHFR	677C>T	T	Risk Ratio of Recurrence	0.14	1.18	0.95	1.48	NO DATA	NO DATA	NO DATA	NO DATA
																						TGFB1	29T>C	C	Risk Ratio of Recurrence	0.13	1.18	0.95	1.47	NO DATA	NO DATA	NO DATA	NO DATA
																						FASLG	844C>T	T	Risk Ratio of Recurrence	0.84	0.98	0.77	1.24	NO DATA	NO DATA	NO DATA	NO DATA
																						FAS	1377G>A	A	Risk Ratio of Recurrence	0.16	0.78	0.56	1.1	NO DATA	NO DATA	NO DATA	NO DATA
																						FAS	670A>G	G	Risk Ratio of Recurrence	0.55	1.07	0.85	1.35	NO DATA	NO DATA	NO DATA	NO DATA
																						PTGS2	8473T>C	C	Risk Ratio of Recurrence	0.99	0.99	0.8	1.25	NO DATA	NO DATA	NO DATA	NO DATA
																						SULT1A1	638G>A	A	Risk Ratio of Recurrence	0.56	1.08	0.84	1.37	NO DATA	NO DATA	NO DATA	NO DATA
48	De Bock G.H.	2004	J Med Genet	Tumour characteristics and prognosis of breast cancer patients carrying the germline CHEK2*1100delC variant	Cohort	No name	Netherlands	NO DATA	1084	3.8	49	Not specified	NO DATA	NO DATA	All stages	All subtypes	Registry	Registry	Registry	Registry	PCR Sequencing	CHEK2	rs555607708	1100delC	Log-rank test	0.005	NA	NA	NA	NO DATA	NA	NA	NA	Non of the covariates yielded statistically significant contribution.	Yes	Yes	NO DATA	NO DATA	NO DATA	Yes	High	Disease-free survival
																								1100delC	Log-rank test	0.04	NA	NA	NA	NO DATA	NA	NA	NA									Contralateral breast cancer-free survival
																								1100delC	Log-rank test	0.001	NA	NA	NA	NO DATA	NA	NA	NA									Distant metastasis-free survival
																								1100delC	Log-rank test	0.54	NA	NA	NA	NO DATA	NA	NA	NA									Overall survival
																								1100delC	Relative Risk	NO DATA	5.74	1.67	19.65	NO DATA	NA	NA	NA									Contralateral breast cancer
																								1100delC	Relative Risk	NO DATA	0.03	0	284	NO DATA	NA	NA	NA									Local-regional recurrence
																								1100delC	Relative Risk	NO DATA	2.81	1.2	6.58	NO DATA	NA	NA	NA									Distant metastasis
																								1100delC	Relative Risk	NO DATA	1.76	0.52	5.93	NO DATA	NA	NA	NA									Death
49	Li Hu	2022	NPJ Breast Cancer	Clinical relevance of pathogenic germline variants in mismatch repair genes in Chinese breast cancer patients	Cohort	Chinese consecutive breast cancer cohort	China	Chinese	8085	5.44	55.3	Not specified	Chinese Han	NO DATA	I-III	All subtypes	Registry	NA	Registry	Registry	Next generation sequencing	MLH1, MSH2, MSH6, PMS2	Group of mutations	NA	Hazard ratio	0.027	2.7	1.12	6.49	0.06	2.34	0.97	5.66	Age, tumor size, lymph node, tumor grade, ER/PR/HER2 status and treatment.	Yes	Yes	NO DATA	NO DATA	NO DATA	Yes	Low	Worse RFS
																								NA	Hazard ratio	0.004	3.24	1.45	7.22	0.03	2.76	1.14	6.69									Worse DRFS
50	Jiayang Zhang	2022	Front Oncol	Germline Mutational Landscape in Chinese Patients With Advanced Breast Cancer	Cohort	No name	China	Chinese	356	4.33	49	Women	Chinese	NO DATA	All stages	All subtypes	Registry	NA	NA	Registry	Next generation sequencing	BRCA1	Not specified	NA	Log-rank test	0.36	NA	NA	NA	NA	NA	NA	NA	NO DATA	Yes	Yes	NO DATA	NO DATA	NO DATA	Yes	Moderate	DFS
																						BRCA2	Not specified	NA	Log-rank test	0.04	NA	NA	NA	NA	NA	NA	NA									DFS
51	Jinhao Wang	2023	Front Oncol	Clinicopathologic features, genomic profiles and outcomes of younger vs. older Chinese hormone receptor-positive (HR+)/HER2-negative (HER2-) metastatic breast cancer patients	Cohort	No name	China	Chinese	63	Not specified	50.3	Women	Chinese	33.33	IV	HR+, HER2-	Registry	NA	NA	Registry	NGS by PredicineATLAS	BRCA2, DNMT3A, ALOX12B, ATM, BARD1, BRCA1, CHEK2, IDH1, NOTCH3, PMS and RECQL.	Group of mutations	NA	Log-rank test	0.79	NA	NA	NA	NA	NA	NA	NA	De novo Stage IV disease, molecular subtype, Ki67 index, resistance to adjuvant endocrine therapy and the presence of ctDNA alterations.	Yes	Yes	NO DATA	NO DATA	NO DATA	Yes	High	DFS
																										0.63	NA	NA	NA	NA	NA	NA	NA									PFS
																										0.4	NA	NA	NA	NA	NA	NA	NA									OS
52	Anna Maria Hage	2024	Cancers (Basel)	Subtype-Specific Survival of Young Women with Breast Cancer and Its Interaction with the Germline BRCA Status	Retrospective Cohort	No name	Germany	NO DATA	473	3.58	35	Women	NO DATA	NO DATA	All stages	All subtypes	Registry	NA	Registry	Registry	NO DATA (Registry)	BRCA1 or BRCA2	Not specified	NA	Log-rank test	0.012	NA	NA	NA	NA	NA	NA	NA	No multiple testing	Yes	Yes	NO DATA	NO DATA	NO DATA	Yes	High	In TNBC, gBRCAm was associated with better DDFS than gBRCAwt (5-year DDFS)
																								NA	Log-rank test	0.001	NA	NA	NA	NA	NA	NA	NA									In TNBC, gBRCAm was associated with better OS than gBRCAwt (5-year OS)
53	Petr Holý	2022	Biochimie	Germline and somatic genetic variability of oxysterol-related genes in breast cancer patients with early disease of the luminal subtype	Cohort	No name	Czech Republic	European	101	NO DATA	57.6	Women	Slavic Caucasian	74.26	I-II	All subtypes	Registry	NA	NA	Registry	Illumina NextSeq 500 Platform	ABCA1	rs2066714	C	Log-rank test	0.005	NA	NA	NA	0.58	NA	NA	NA	Tumor size.	Yes	Yes	NO DATA	Yes (HM patients)	Yes (validation on TCGA dataset)	Yes	Low	HT group, worse DFS
																						ABCA8	rs4147957 A>G	G	Log-rank test	0.007	NA	NA	NA	0.493	NA	NA	NA									Better DFS
																						ABCA8	rs4147957 A>G	G	Log-rank test	0.006	NA	NA	NA	0.58	NA	NA	NA									HT group, better DFS
																						ABCA8	rs4147957 A>G	G	Log-rank test	0.005	NA	NA	NA	0.45	NA	NA	NA									HT group, better OS
																						ABCA8	rs4147967 C>T	T	Log-rank test	0.006	NA	NA	NA	0.45	NA	NA	NA									Worse DFS
																						ABCA8	rs4147967 C>T	T	Log-rank test	0.00053	NA	NA	NA	0.335	NA	NA	NA									Worse OS
																						ABCA8	rs4147967 C>T	T	Log-rank test	0.002	NA	NA	NA	0.429	NA	NA	NA									HT group, worse OS
																						ABCC1	rs45511401 G>T	T	Log-rank test	0.009	NA	NA	NA	0.58	NA	NA	NA									HT group, worse DFS
																						ABCG2	rs2231156 C>A	A	Log-rank test	0.009	NA	NA	NA	0.513	NA	NA	NA									Better DFS
																						ABCG2	rs2231156 C>A	A	Log-rank test	0.01	NA	NA	NA	0.58	NA	NA	NA									HT group, better DFS
																						GPR183	rs2230342 C>A	A	Log-rank test	0.008	NA	NA	NA	0.45	NA	NA	NA									HT group, worse OS
																						HSD3B7	rs17849880 C>T	T	Log-rank test	0.01	NA	NA	NA	0.513	NA	NA	NA									Better DFS
																						LDLR/MIR6886	rs1003723 C>T	T	Log-rank test	0.006	NA	NA	NA	0.45	NA	NA	NA									Worse DFS
																						LDLR/MIR6886	rs1003723 C>T	T	Log-rank test	0.003	NA	NA	NA	0.348	NA	NA	NA									Worse OS
																						LDLR/MIR6886	rs6413504 A>G	G	Log-rank test	0.003	NA	NA	NA	0.348	NA	NA	NA									Worse OS
																						MBTPS1	rs11607 C>T	T	Log-rank test	0.001	NA	NA	NA	0.429	NA	NA	NA									HT group, worse OS
																						MBTPS1	rs7206438 G>T	T	Log-rank test	0.009	NA	NA	NA	0.45	NA	NA	NA									HT group, worse OS
																						NR1I2	rs3732359 G>A	A	Log-rank test	0.009	NA	NA	NA	0.45	NA	NA	NA									HT group, worse OS
																						OSBPL2/MIR1-1HG-AS1)	rs3833323	1892delG	Log-rank test	0.007	NA	NA	NA	0.45	NA	NA	NA									HT group, worse OS
																						OSBPL3	rs7810587 A>C	C	Log-rank test	0.005	NA	NA	NA	0.45	NA	NA	NA									Worse DFS
																						OSBPL3	rs7810587 A>C	C	Log-rank test	0.009	NA	NA	NA	0.58	NA	NA	NA									HT group, worse DFS
																						OSBPL5	rs3217567	150dupC	Log-rank test	0.007	NA	NA	NA	0.58	NA	NA	NA									HT group, worse DFS
54	Stefan Groha	2022	Nature Medicine	Germline variants associated with toxicity to immune checkpoint blockade	Cohort	DFCI	USA	European	1751	NO DATA	NO DATA	Not specified	European	NO DATA	NO DATA	NO DATA	Registry	NA	NA	Registry	Next generation sequencing	IL22RA1	rs75824728	A	Hazard ratio	NO DATA (NO SIGNIFICANCE)	NA	NA	NA	NO DATA	NO DATA	NO DATA	NO DATA	Ancestry, age, sex and line/type of treatment.	Yes	Yes	NO DATA	Yes	Yes (two validation data sets)	Yes	Low	12 cancers
																						IL7	rs16906115	G	Hazard ratio	1.7e-05	NO DATA	NO DATA	NO DATA	NO DATA	NO DATA	NO DATA	NO DATA
																						chr 4p15	rs113861051	G	Hazard ratio	NO DATA (NO SIGNIFICANCE)	NA	NA	NA	NO DATA	NO DATA	NO DATA	NO DATA
